# Supplementary material for: Salmonella enterica Suppresses Pectobacterium carotovorum subsp. carotovorum Population and Soft Rot Progression by Acidifying the Microaerophilic Environment
Source: PubMed Central journal article supplement — mBio. 2013 Feb 12;4(1):e00557-12. doi: 10.1128/mBio.00557-12 (PMC3573663; doi:10.1128/mbio.00557-12), 2013-02-12
Supplement: mbo001131437st1.pdf [file mbo001131437st1.pdf]

**Table S1. Growth of *S. enterica* and *Pcc* in lettuce leaf lysate.**

| <b>Treatment</b>                   | <b>Strain</b>      | <b>Population</b> |   |
|------------------------------------|--------------------|-------------------|---|
| <b>Aerobic</b>                     |                    |                   |   |
| <i>S. enterica</i>                 | <i>S. enterica</i> | 8.69±0.04         | * |
| <i>S. enterica</i> + <i>Pcc</i> WT | <i>S. enterica</i> | 9.03±0.13         |   |
| <i>Pcc</i> WT                      | <i>Pcc</i> WT      | 8.88±0.06         | * |
| <i>S. enterica</i> + <i>Pcc</i> WT | <i>Pcc</i> WT      | 8.54±0.12         |   |
| <b>MAP</b>                         |                    |                   |   |
| <i>S. enterica</i>                 | <i>S. enterica</i> | 8.01±0.09         |   |
| <i>S. enterica</i> + <i>Pcc</i> WT | <i>S. enterica</i> | 7.80±0.13         |   |
| <i>Pcc</i> WT                      | <i>Pcc</i> WT      | 8.24±0.15         | * |
| <i>S. enterica</i> + <i>Pcc</i> WT | <i>Pcc</i> WT      | 7.85±0.18         |   |

Note: Data shown are the means of 3 replicates from representative experiments. The experiment was repeated three times. Statistical analysis was performed using ANOVA and statistically significant ( $p < 0.05$ ) comparisons are indicated with an asterisk (\*).
